# Supplementary material for: Genomic Runs of Homozygosity Record Population History and Consanguinity
Source: PubMed Central journal article supplement (PMC2981575; doi:10.1371/journal.pone.0013996), 2010-11-15

## ONLINE SUPPLEMENTARY TABLES AND FIGURES – KIRIN ET AL

**Supplementary Table 1.** Wald test statistic and significance levels for the linear mixed model.

| Variable                    | Wald test | P value |
|-----------------------------|-----------|---------|
| Median                      | 6.18      | 0.0001  |
| 75 <sup>th</sup> percentile | 6.72      | <0.0001 |
| Number of ROH               | 82.23     | <0.0001 |

There is a significant difference between the number and the length of ROH between all the continents. The differences between the length of ROH are tested using the median and the 75<sup>th</sup> percentile values of ROH per individual within a continent.

**Supplementary Table 2.** Difference between the proportion of the individuals with ROH of different lengths between continental regions were tested by  $\chi^2$  test. P-values are given in the tables below. Differences were tested for four different length ranges (2-4 Mb, 4-8 Mb, 8-16 Mb, >16 Mb). Significant results are highlighted.

| <u>2-4Mb</u>     | C/S America       | Oceania           | C/S Asia          | W Asia            | E Asia | Europe |
|------------------|-------------------|-------------------|-------------------|-------------------|--------|--------|
| Oceania          | 0.5623            |                   |                   |                   |        |        |
| C/S Asia         | <b>0.0004</b>     | 0.0568            |                   |                   |        |        |
| W Asia           | 0.0015            | 0.0934            | 0.6824            |                   |        |        |
| E Asia           | <b>&lt;0.0001</b> | 0.0014            | 0.0008            | <b>0.0002</b>     |        |        |
| Europe           | <b>&lt;0.0001</b> | 0.0043            | 0.0176            | 0.0055            | 0.5353 |        |
| Africa           | <b>&lt;0.0001</b> | 0.0129            | 0.1741            | 0.0718            | 0.1794 | 0.54   |
| <u>4-8 Mb</u>    | C/S America       | Oceania           | C/S Asia          | W Asia            | E Asia | Europe |
| Oceania          | 0.0887            |                   |                   |                   |        |        |
| C/S Asia         | <b>&lt;0.0001</b> | 0.8045            |                   |                   |        |        |
| W Asia           | 0.0575            | 0.7349            | 0.1058            |                   |        |        |
| E Asia           | <b>&lt;0.0001</b> | <b>&lt;0.0001</b> | <b>&lt;0.0001</b> | <b>&lt;0.0001</b> |        |        |
| Europe           | <b>&lt;0.0001</b> | 0.0009            | <b>&lt;0.0001</b> | <b>&lt;0.0001</b> | 0.4388 |        |
| Africa           | <b>&lt;0.0001</b> | 0.0821            | 0.0136            | <b>0.0001</b>     | 0.0014 | 0.0293 |
| <u>8-16 Mb</u>   | C/S America       | Oceania           | C/S Asia          | W Asia            | E Asia | Europe |
| Oceania          | <b>&lt;0.0001</b> |                   |                   |                   |        |        |
| C/S Asia         | <b>&lt;0.0001</b> | 0.0820            |                   |                   |        |        |
| W Asia           | 0.00892           | 0.0073            | 0.0963            |                   |        |        |
| E Asia           | <b>&lt;0.0001</b> | 0.1685            | <b>&lt;0.0001</b> | <b>&lt;0.0001</b> |        |        |
| Europe           | <b>&lt;0.0001</b> | 1                 | <b>&lt;0.0001</b> | <b>&lt;0.0001</b> | 0.9300 |        |
| Africa           | <b>&lt;0.0001</b> | 0.2540            | <b>&lt;0.0001</b> | <b>&lt;0.0001</b> | 0.1703 | 0.1965 |
| <u>&gt;16 Mb</u> | C/S America       | Oceania           | C/S Asia          | W Asia            | E Asia | Europe |
| Oceania          | <b>0.0001</b>     |                   |                   |                   |        |        |
| C/S Asia         | <b>&lt;0.0001</b> | 0.0848            |                   |                   |        |        |
| W Asia           | <b>&lt;0.0001</b> | 0.0784            | 0.9905            |                   |        |        |
| E Asia           | <b>&lt;0.0001</b> | 0.2663            | <b>&lt;0.0001</b> | <b>&lt;0.0001</b> |        |        |
| Europe           | <b>&lt;0.0001</b> | 0.9772            | <b>&lt;0.0001</b> | <b>&lt;0.0001</b> | 0.2135 |        |
| Africa           | <b>&lt;0.0001</b> | 0.9021            | <b>0.0001</b>     | <b>0.0001</b>     | 0.3664 | 0.8996 |

**Supplementary Table 3.** Difference between the total mean length of ROH of the individuals between continental regions were tested by Mann-Whitney test. P-values are given in the tables below. Differences were tested for the four different cut-off lengths (>1.5 Mb, >3 Mb, >5 Mb, >10 Mb). Significant results are highlighted.

| >1.5 Mb  | C/S America | Oceania | C/S Asia             | W Asia  | E Asia | Europe |
|----------|-------------|---------|----------------------|---------|--------|--------|
| Oceania  | <0.0001     |         |                      |         |        |        |
| C/S Asia | <0.0001     | 0.0653  |                      |         |        |        |
| W Asia   | <0.0001     | 0.1428  | 0.3143               |         |        |        |
| E Asia   | <0.0001     | <0.0001 | <0.0001              | <0.0001 |        |        |
| Europe   | <0.0001     | <0.0001 | <0.0001              | <0.0001 | 0.7742 |        |
| Africa   | <0.0001     | <0.0001 | <0.0001              | <0.0001 | 0.3209 | 0.1646 |
| >3Mb     | C/S America | Oceania | C/S Asia             | W Asia  | E Asia | Europe |
| Oceania  | <0.0001     |         |                      |         |        |        |
| C/S Asia | <0.0001     | 0.5727  |                      |         |        |        |
| W Asia   | <0.0001     | 0.1044  | 0.319                |         |        |        |
| E Asia   | <0.0001     | <0.0001 | <0.0001              | <0.0001 |        |        |
| Europe   | <0.0001     | <0.0001 | <0.0001              | <0.0001 | 0.1838 |        |
| Africa   | <0.0001     | 0.0002  | <0.0001 <sup>7</sup> | <0.0001 | 0.0003 | 0.0069 |
| >5 Mb    | C/S America | Oceania | C/S Asia             | W Asia  | E Asia | Europe |
| Oceania  | <0.0001     |         |                      |         |        |        |
| C/S Asia | <0.0001     | 0.0214  |                      |         |        |        |
| W Asia   | <0.0001     | 0.0027  | 0.4291               |         |        |        |
| E Asia   | <0.0001     | 0.0010  | <0.0001              | <0.0001 |        |        |
| Europe   | <0.0001     | 0.0001  | <0.0001              | <0.0001 | 0.2578 |        |
| Africa   | <0.0001     | 0.1484  | <0.0001              | <0.0001 | 0.0057 | 0.0005 |
| >10 Mb   | C/S America | Oceania | C/S Asia             | W Asia  | E Asia | Europe |
| Oceania  | <0.0001     |         |                      |         |        |        |
| C/S Asia | <0.0001     | 0.0038  |                      |         |        |        |
| W Asia   | <0.0001     | 0.0002  | 0.2287               |         |        |        |
| E Asia   | <<0.0001    | 0.1642  | <0.0001              | <0.0001 |        |        |
| Europe   | <0.0001     | 0.5267  | <0.0001              | <0.0001 | 0.2952 |        |
| Africa   | <0.0001     | 0.7235  | <0.0001              | <0.0001 | 0.1548 | 0.6996 |

**Supplementary Table 4.** Central/South Asian and West Asian populations are grouped together as are the European and East Asian populations. Differences between these two new groups were tested by  $\chi^2$ . P values are given in the table. Differences were tested for four different ROH length categories (2-4 Mb, 4-8 Mb, 8-16 Mb, >16 Mb).

|                                                         | 2-4 Mb  | 4-8 Mb  | 8-16 Mb | >16     |
|---------------------------------------------------------|---------|---------|---------|---------|
| (Central/South Asia + West Asia) - (East Asia + Europe) | <0.0001 | <0.0001 | <0.0001 | <0.0001 |

**Supplementary Table 5.** Proportion of the genome ( %) covered in runs of homozygosity above the give threshold for the probability of an extended haplotype. Results are given as an average value for an individual in a given population.

| Population    | no<br>threshold | >0.04 cM | >0.05 cM | >0.06 cM | >0.1cM  | >0.5 cM | >1 cM   | >2 cM   | >5 cM  |
|---------------|-----------------|----------|----------|----------|---------|---------|---------|---------|--------|
| Balochi       | 7.9120          | 7.6659   | 7.6647   | 7.6611   | 7.5798  | 5.6639  | 4.9527  | 4.4290  | 3.0969 |
| Brahui        | 5.9733          | 5.7482   | 5.7408   | 5.7358   | 5.6641  | 3.6563  | 2.9852  | 2.5265  | 1.6578 |
| Burusho       | 4.0931          | 3.9653   | 3.9608   | 3.9569   | 3.8747  | 1.9775  | 1.3083  | 1.0519  | 0.6459 |
| Hazara        | 4.4820          | 4.3073   | 4.3013   | 4.2887   | 4.2094  | 2.1729  | 1.4771  | 1.2852  | 0.8493 |
| Kalash        | 8.1577          | 7.8841   | 7.8825   | 7.8805   | 7.7913  | 5.5992  | 4.5696  | 3.5510  | 1.6361 |
| Makrani       | 7.0363          | 6.7998   | 6.7973   | 6.7937   | 6.7227  | 4.8723  | 4.1795  | 3.7894  | 2.6708 |
| Pathan        | 5.7090          | 5.4922   | 5.4884   | 5.4848   | 5.4086  | 3.4883  | 2.8205  | 2.5902  | 1.8950 |
| Sindhi        | 5.4996          | 5.2988   | 5.2976   | 5.2942   | 5.2145  | 3.3272  | 2.7021  | 2.3820  | 1.6087 |
| Uygur         | 3.0459          | 2.9457   | 2.9437   | 2.9348   | 2.8666  | 0.9691  | 0.4169  | 0.3043  | 0.2545 |
| Bantu         | 1.8139          | 1.7698   | 1.7698   | 1.7673   | 1.7228  | 1.2066  | 0.8140  | 0.5032  | 0.2162 |
| Biaka Pygmies | 2.8909          | 2.7718   | 2.7706   | 2.7679   | 2.7301  | 2.2412  | 1.8371  | 1.1928  | 0.3497 |
| Mandenka      | 1.8155          | 1.7559   | 1.7546   | 1.7521   | 1.7208  | 0.9700  | 0.6272  | 0.5205  | 0.3731 |
| Mbuti Pygmies | 3.5846          | 3.4658   | 3.4658   | 3.4571   | 3.4085  | 2.4566  | 1.7347  | 0.9791  | 0.4231 |
| San           | 4.0096          | 3.8698   | 3.8698   | 3.8698   | 3.8049  | 2.9209  | 2.2495  | 1.7100  | 0.8023 |
| Yoruba        | 1.6059          | 1.5335   | 1.5309   | 1.5309   | 1.4763  | 0.7508  | 0.3255  | 0.1380  | 0.0686 |
| Colombian     | 15.0126         | 14.5989  | 14.5989  | 14.5989  | 14.5020 | 10.4331 | 6.2256  | 3.9881  | 2.7625 |
| Karitiana     | 20.5416         | 19.8365  | 19.8357  | 19.8316  | 19.7575 | 15.5160 | 10.8608 | 8.1562  | 5.3507 |
| Maya          | 9.3244          | 8.9956   | 8.9937   | 8.9849   | 8.9041  | 5.1461  | 1.6904  | 0.4815  | 0.3055 |
| Pima          | 16.1817         | 15.6636  | 15.6625  | 15.6524  | 15.5742 | 11.8951 | 7.9883  | 5.9443  | 4.0999 |
| Surui         | 25.0511         | 24.1767  | 24.1767  | 24.1767  | 24.1013 | 19.9967 | 15.4295 | 12.6948 | 9.1760 |
| Adygei        | 4.0152          | 3.8625   | 3.8596   | 3.8449   | 3.7752  | 1.5821  | 0.6906  | 0.4771  | 0.2978 |
| Basque        | 5.4703          | 5.2825   | 5.2756   | 5.2688   | 5.1813  | 2.6805  | 1.4127  | 0.8059  | 0.2558 |
| French        | 4.2608          | 4.0796   | 4.0786   | 4.0702   | 3.9923  | 1.5120  | 0.4938  | 0.2866  | 0.2054 |
| Italia        | 4.6552          | 4.5177   | 4.5177   | 4.5128   | 4.4158  | 1.9931  | 1.0776  | 0.8631  | 0.6644 |
| Orcadian      | 4.4886          | 4.3373   | 4.3349   | 4.3257   | 4.2393  | 1.8114  | 0.7318  | 0.4653  | 0.2006 |
| Russian       | 4.1194          | 3.9581   | 3.9562   | 3.9529   | 3.8878  | 1.4931  | 0.4183  | 0.1541  | 0.0250 |
| Sardinian     | 5.3196          | 5.0972   | 5.0930   | 5.0849   | 5.0127  | 2.4353  | 1.1416  | 0.7207  | 0.3021 |
| Tuscan        | 3.7727          | 3.5702   | 3.5663   | 3.5632   | 3.4880  | 1.3146  | 0.3246  | 0.1493  | 0.1017 |
| Melanesian    | 10.7464         | 10.3808  | 10.3724  | 10.3699  | 10.2822 | 6.3807  | 3.0053  | 1.1444  | 0.3299 |
| Papuan        | 12.7762         | 12.4377  | 12.4377  | 12.4308  | 12.3563 | 7.8225  | 3.7670  | 1.8569  | 0.7512 |
| Cambodian     | 4.5366          | 4.3916   | 4.3882   | 4.3833   | 4.2978  | 1.5612  | 0.4354  | 0.1372  | 0.0432 |
| Dai           | 5.3845          | 5.1609   | 5.1532   | 5.1507   | 5.0698  | 2.0485  | 0.6327  | 0.3752  | 0.2018 |
| Daur          | 4.9901          | 4.7992   | 4.7960   | 4.7901   | 4.7053  | 1.9639  | 0.6466  | 0.3299  | 0.1163 |
| Han           | 4.7277          | 4.5792   | 4.5753   | 4.5690   | 4.4733  | 1.5091  | 0.2242  | 0.0238  | 0.0036 |
| Hezhen        | 5.5268          | 5.3364   | 5.3271   | 5.3198   | 5.1979  | 2.2103  | 0.8630  | 0.5866  | 0.3948 |
| Japanese      | 5.5847          | 5.3686   | 5.3654   | 5.3537   | 5.2692  | 2.0844  | 0.6189  | 0.2583  | 0.1790 |
| Lahu          | 6.8120          | 6.6167   | 6.6167   | 6.6019   | 6.5174  | 3.7878  | 2.3996  | 1.5518  | 0.5948 |
| Miaozu        | 5.6755          | 5.4856   | 5.4799   | 5.4726   | 5.3717  | 2.5089  | 1.1220  | 0.7024  | 0.2805 |
| Mongol        | 4.2446          | 4.1162   | 4.1162   | 4.1107   | 3.9982  | 1.2844  | 0.1895  | 0.0507  | 0.0100 |
| Naxi          | 5.3733          | 5.1969   | 5.1927   | 5.1873   | 5.0623  | 2.1333  | 0.7011  | 0.3403  | 0.1298 |
| Oroqen        | 5.5926          | 5.4553   | 5.4535   | 5.4507   | 5.3790  | 2.5951  | 1.0848  | 0.5533  | 0.1628 |
| She           | 5.7768          | 5.5653   | 5.5653   | 5.5600   | 5.4739  | 2.5530  | 1.2760  | 0.9034  | 0.4840 |
| Tu            | 4.2919          | 4.1056   | 4.0984   | 4.0937   | 3.9983  | 1.2021  | 0.2554  | 0.1312  | 0.0882 |
| Tujia         | 5.6475          | 5.4176   | 5.4176   | 5.4103   | 5.3193  | 2.3356  | 1.1694  | 0.9925  | 0.7915 |
| Xibo          | 4.3012          | 4.1445   | 4.1393   | 4.1297   | 4.0434  | 1.3105  | 0.1579  | 0.0244  | 0.0244 |
| Yakut         | 6.5391          | 6.3441   | 6.3399   | 6.3366   | 6.2575  | 3.5958  | 2.2157  | 1.5396  | 0.5800 |
| Yizu          | 5.4255          | 5.2007   | 5.1988   | 5.1968   | 5.1067  | 2.1666  | 0.8097  | 0.4578  | 0.1401 |
| Bedouin       | 7.1589          | 6.9066   | 6.9040   | 6.8997   | 6.8307  | 4.9140  | 4.0001  | 3.3658  | 2.1784 |
| Druze         | 6.6461          | 6.4484   | 6.4471   | 6.4393   | 6.3530  | 4.1369  | 3.3476  | 3.0531  | 2.1589 |
| Mozabite      | 4.7206          | 4.5784   | 4.5784   | 4.5761   | 4.4992  | 2.9841  | 2.2837  | 1.7489  | 0.8059 |

**Supplementary Figure.** Individual patterns of long runs of homozygosity. The number of runs of homozygosity compared to the total length in ROH for each individual in the HGDP by population for each continental region.

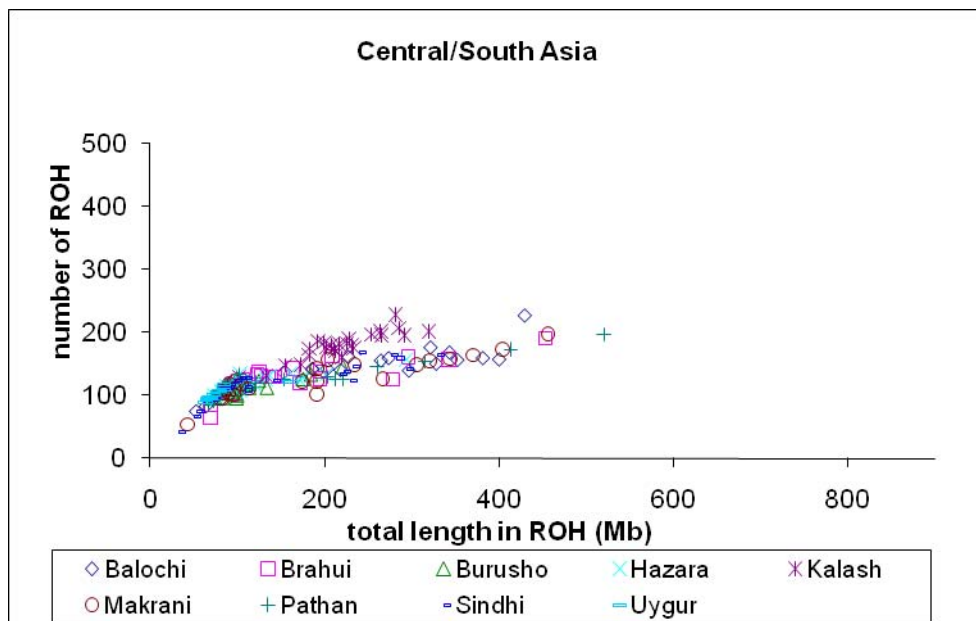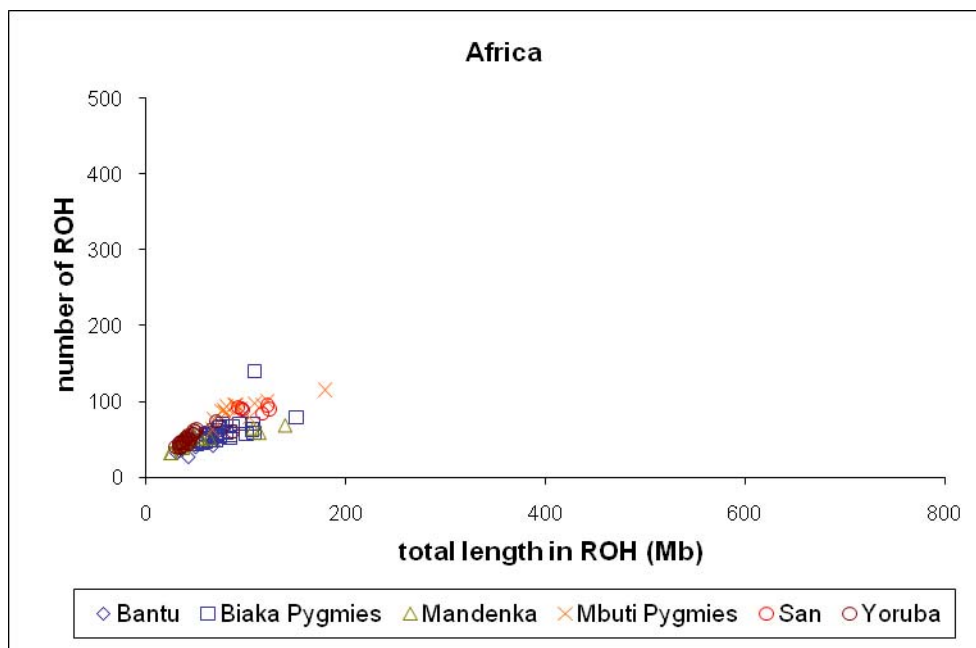

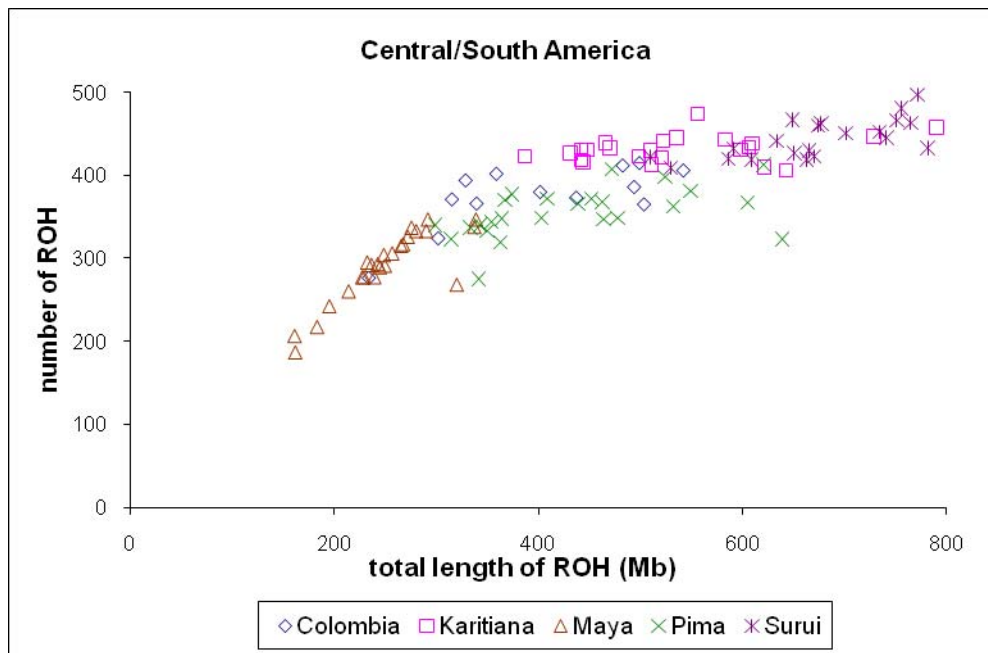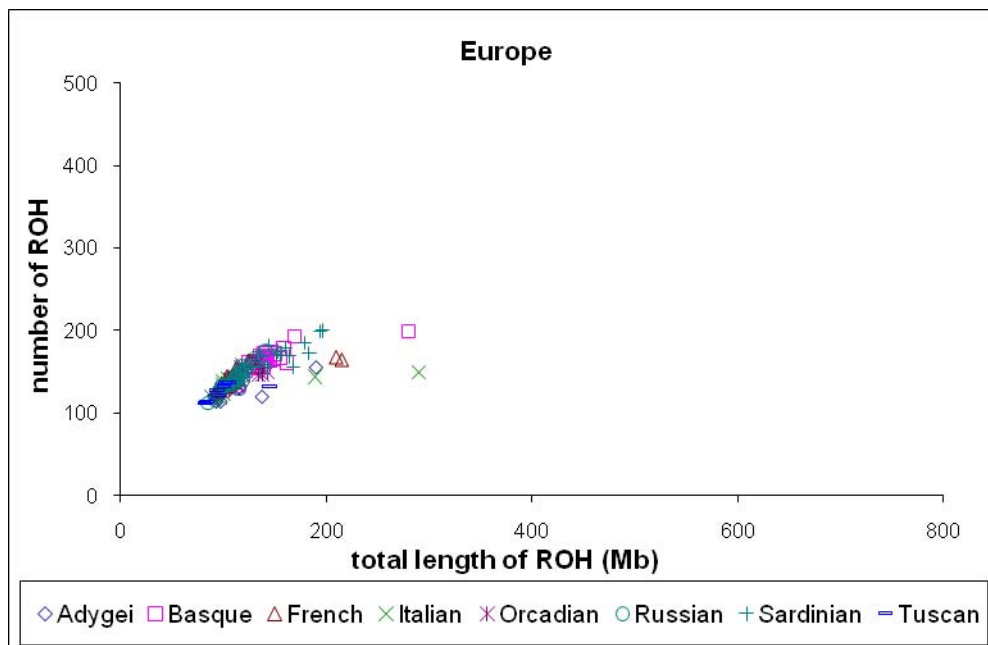

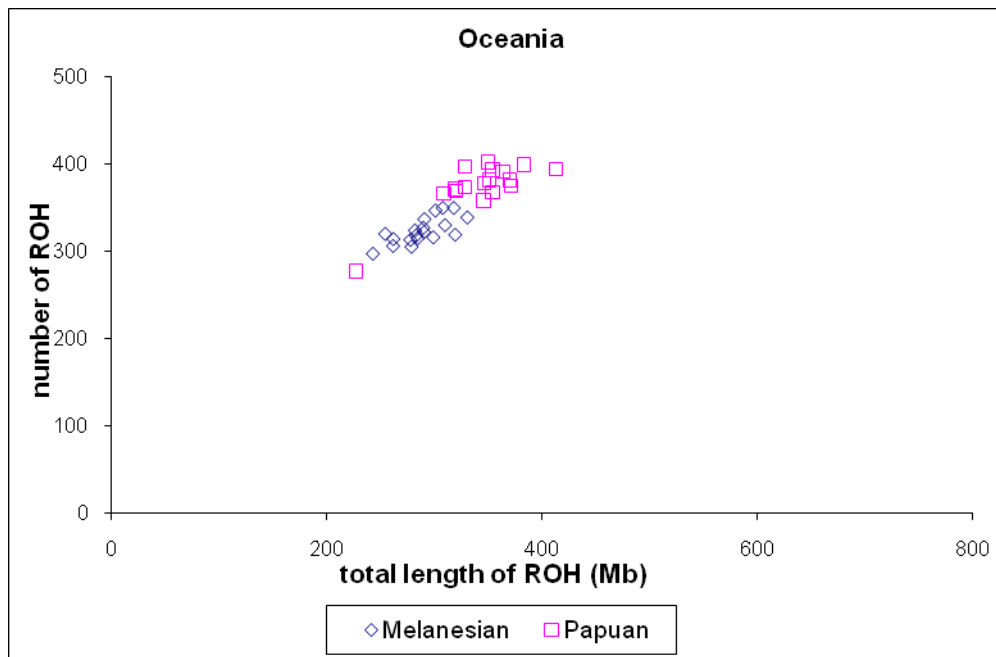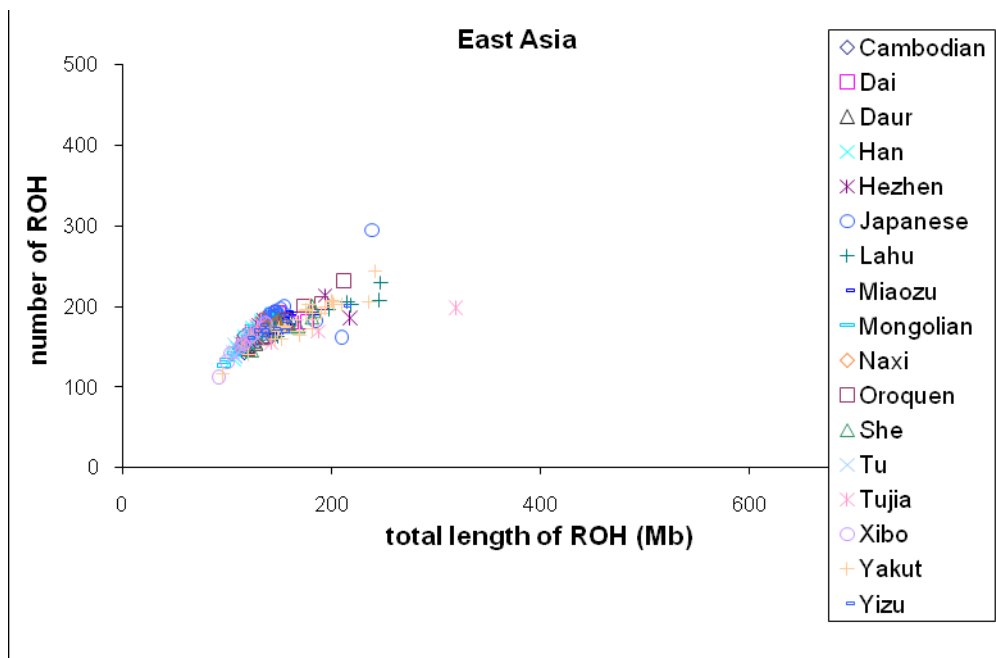

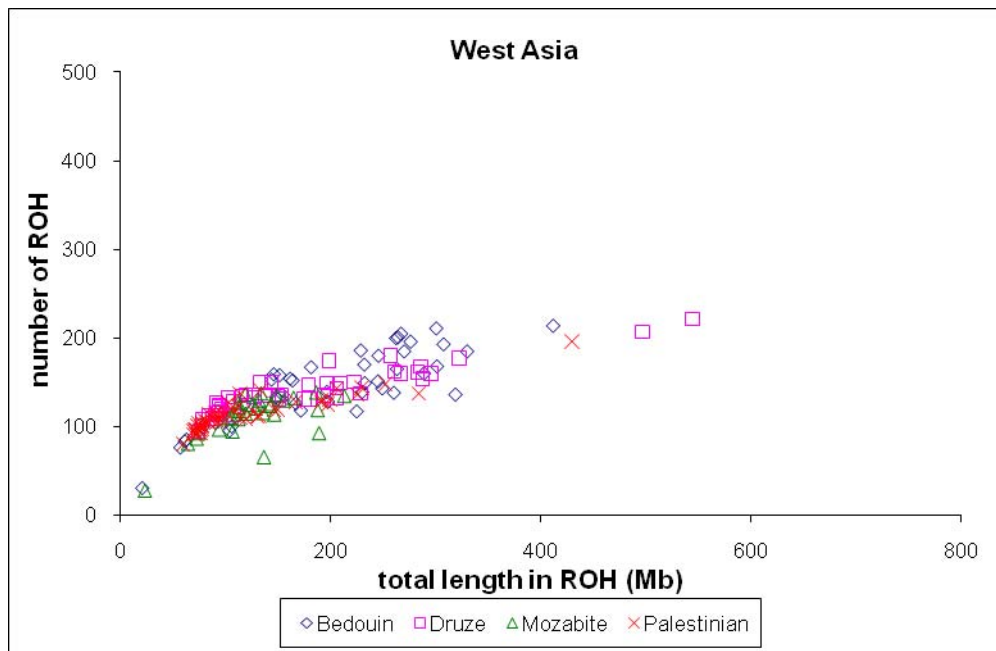

Supplement: pone.0013996.s001.pdf [file pone.0013996.s001.pdf]
